# Supplementary material for: The heavy atom effect on Zn(ii) phthalocyanine derivatives: a theoretical exploration of the photophysical properties
Source: Royal Society of Chemistry journal article supplement (doi:10.1039/c5cp03833b), 2015-01-01
Supplement: c5cp03833b1.pdf [file c5cp03833b1.pdf]

## Supporting Information

### Heavy atom effect on Zn(II) phthalocyanines derivatives: a theoretical exploration of the photophysical properties

Marta E. Alberto, Bruna C. De Simone, Gloria Mazzone, Emilia Sicilia, Nino Russo

- Cartesian coordinates of compounds **A,B** and **1-7**.

-S1-





|    |           |           |           |
|----|-----------|-----------|-----------|
| C  | -3.230885 | -2.681914 | -0.445499 |
| C  | -3.934201 | -1.450538 | -0.429907 |
| C  | -5.331301 | -1.413500 | -0.561897 |
| C  | -5.995557 | -2.640759 | -0.617910 |
| C  | -5.306014 | -3.847726 | -0.631258 |
| C  | -3.910799 | -3.901476 | -0.590521 |
| C  | -1.824732 | -2.349204 | -0.234568 |
| C  | -2.929719 | -0.412699 | -0.210307 |
| H  | -7.080214 | -2.640151 | -0.713353 |
| H  | -5.858592 | -4.780128 | -0.737462 |
| N  | -1.695361 | -0.992557 | -0.148701 |
| N  | -0.859826 | -3.242095 | -0.059395 |
| C  | 0.423145  | -2.962848 | 0.122812  |
| C  | 1.460117  | -3.963840 | 0.361001  |
| C  | 2.689370  | -3.260035 | 0.376211  |
| C  | 1.423536  | -5.358984 | 0.515370  |
| C  | 2.359983  | -1.855875 | 0.143268  |
| C  | 3.905082  | -3.937363 | 0.553160  |
| C  | 2.649912  | -6.020673 | 0.609020  |
| C  | 3.857221  | -5.330221 | 0.632283  |
| H  | 2.647831  | -7.102995 | 0.727756  |
| H  | 4.788435  | -5.877329 | 0.771754  |
| N  | 1.004866  | -1.729741 | 0.044720  |
| N  | -3.205064 | 0.870078  | -0.012117 |
| C  | -2.307978 | 1.830163  | 0.165565  |
| C  | -2.637062 | 3.231887  | 0.413820  |
| C  | -1.407648 | 3.935524  | 0.406780  |
| C  | -3.852547 | 3.907858  | 0.597626  |
| C  | -0.370861 | 2.937026  | 0.157925  |
| C  | -1.370674 | 5.329006  | 0.576064  |
| C  | -3.804299 | 5.299612  | 0.692875  |
| C  | -2.596754 | 5.989946  | 0.677439  |
| H  | -4.735427 | 5.845282  | 0.838399  |
| H  | -2.594313 | 7.070897  | 0.808071  |
| N  | -0.952766 | 1.705010  | 0.065980  |
| N  | 0.912167  | 3.218321  | -0.020924 |
| C  | 1.876991  | 2.327708  | -0.207356 |
| C  | 3.283099  | 2.662760  | -0.414999 |
| C  | 3.986253  | 1.431160  | -0.414637 |
| C  | 3.963270  | 3.883778  | -0.545523 |
| C  | 2.981694  | 0.390984  | -0.207040 |
| C  | 5.383256  | 1.395255  | -0.547595 |
| C  | 5.358542  | 3.830199  | -0.586548 |
| C  | 6.047830  | 2.623055  | -0.588033 |
| H  | 5.911457  | 4.763651  | -0.681267 |
| H  | 7.132494  | 2.623447  | -0.683407 |
| N  | 1.747480  | 0.970102  | -0.137974 |
| Zn | 0.026020  | -0.011559 | -0.080511 |
| N  | 3.257062  | -0.893981 | -0.023715 |
| S  | 5.512511  | -3.190436 | 0.668063  |
| S  | -6.346028 | 0.042152  | -0.645724 |
| S  | -5.460042 | 3.159769  | 0.703089  |
| S  | 0.090049  | 6.336117  | 0.652802  |
| S  | 3.234691  | 5.498120  | -0.650736 |
| S  | 6.397974  | -0.059097 | -0.650153 |
| C  | -5.620797 | 0.902098  | -2.074687 |
| H  | -4.635616 | 1.307937  | -1.825414 |
| H  | -5.567173 | 0.228821  | -2.936664 |
| H  | -6.301025 | 1.729352  | -2.302663 |
| C  | 5.233467  | -1.996868 | 2.001648  |
| H  | 5.018982  | -1.005145 | 1.599148  |
| H  | 4.441665  | -2.346433 | 2.669586  |
| C  | 5.671362  | -0.904066 | -2.087297 |
| H  | 4.688063  | -1.316100 | -1.840652 |
| H  | 5.613358  | -0.220719 | -2.941037 |
| H  | 6.353659  | -1.726344 | -2.326814 |
| C  | -5.181661 | 1.955995  | 2.027642  |
| H  | -4.965993 | 0.967821  | 1.617273  |
| H  | -4.390450 | 2.300712  | 2.698769  |
| S  | -0.037026 | -6.366777 | 0.583706  |
| S  | -3.182033 | -5.514644 | -0.713008 |
| C  | -0.897367 | -5.645483 | 2.014026  |
| H  | -0.225672 | -5.600513 | 2.877706  |
| H  | -1.297089 | -4.657215 | 1.767490  |
| H  | -1.729016 | -6.321856 | 2.236418  |
| C  | -2.046838 | -5.306394 | -2.117246 |
| H  | -2.556821 | -4.798262 | -2.942690 |
| H  | -1.147398 | -4.765705 | -1.808267 |
| H  | -1.770034 | -6.317986 | -2.431598 |
| C  | 2.097359  | 5.302994  | -2.055191 |
| H  | 2.606336  | 4.802573  | -2.885949 |
| H  | 1.198577  | 4.759066  | -1.749655 |
| H  | 1.819995  | 6.317431  | -2.359688 |
| C  | 0.949448  | 5.604706  | 2.078533  |
| H  | 0.278075  | 5.555595  | 2.942238  |
| H  | 1.347453  | 4.617407  | 1.825834  |
| H  | 1.782523  | 6.278082  | 2.304655  |
| I  | -6.981657 | 1.708896  | 3.240196  |
| I  | 7.032968  | -1.759694 | 3.217096  |
